# Supplementary material for: A companion perturbation theory for state-specific multireference coupled cluster methods
Source: Royal Society of Chemistry journal article supplement (doi:10.1039/b822910d), 2009-01-01
Supplement: b822910d.pdf [file b822910d.pdf]

# Electronic Supplementary Information

## A companion perturbation theory for state-specific multireference coupled cluster methods

Francesco A. Evangelista,<sup>a</sup> Andrew C. Simmonett,<sup>a</sup> Henry F. Schaefer III,<sup>a</sup> Debashis Mukherjee,<sup>b</sup> and Wesley D. Allen.<sup>a</sup>

Content: Cartesian geometries of *m*-benzyne.

---

<sup>a</sup> Center for Computational Chemistry and Department of Chemistry, University of Georgia, Athens, GA 30602, USA

<sup>b</sup> Department of Physical Chemistry, Indian Association for the Cultivation of Science, Kolkata, India

## Cartesian geometries of *m*-benzyne (bohr)

### Singlet *m*-benzyne CASSCF(2,2)-Mk-MRPT2/cc-pVTZ (delocalized orbitals)

|   |               |              |               |
|---|---------------|--------------|---------------|
| C | 0.0000000000  | 0.0000000000 | 3.1195985811  |
| C | -1.7693072723 | 0.0000000000 | 1.2715194943  |
| C | 1.7693072723  | 0.0000000000 | 1.2715194943  |
| C | -2.1923862589 | 0.0000000000 | -1.2867045880 |
| C | 2.1923862589  | 0.0000000000 | -1.2867045880 |
| C | 0.0000000000  | 0.0000000000 | -2.7706573707 |
| H | 0.0000000000  | 0.0000000000 | 5.1561026409  |
| H | -4.0791288681 | 0.0000000000 | -2.0643719130 |
| H | 4.0791288681  | 0.0000000000 | -2.0643719130 |
| H | 0.0000000000  | 0.0000000000 | -4.8205294077 |

### Singlet *m*-benzyne CASSCF(2,2)-Mk-MRPT2/cc-pVTZ (pseudo second-order energy, see Summary for details)

|   |               |              |               |
|---|---------------|--------------|---------------|
| C | 0.0000000000  | 0.0000000000 | 3.0470373022  |
| C | -1.8865017420 | 0.0000000000 | 1.2931693564  |
| C | 1.8865017420  | 0.0000000000 | 1.2931693564  |
| C | -2.2046008719 | 0.0000000000 | -1.2810831066 |
| C | 2.2046008719  | 0.0000000000 | -1.2810831066 |
| C | 0.0000000000  | 0.0000000000 | -2.7420677640 |
| H | 0.0000000000  | 0.0000000000 | 5.0812378793  |
| H | -4.0730622789 | 0.0000000000 | -2.1042204534 |
| H | 4.0730622789  | 0.0000000000 | -2.1042204534 |
| H | 0.0000000000  | 0.0000000000 | -4.7918348289 |

### Singlet *m*-benzyne RHF-CCSD/cc-pVTZ

|   |               |              |               |
|---|---------------|--------------|---------------|
| C | 0.0000000000  | 0.0000000000 | 3.2821665466  |
| C | -1.4773325610 | 0.0000000000 | 1.2058898704  |
| C | 1.4773325610  | 0.0000000000 | 1.2058898704  |
| C | -2.2053008006 | 0.0000000000 | -1.3021161025 |
| C | 2.2053008006  | 0.0000000000 | -1.3021161025 |
| C | 0.0000000000  | 0.0000000000 | -2.7947461161 |
| H | 0.0000000000  | 0.0000000000 | 5.3224020033  |
| H | -4.1188181607 | 0.0000000000 | -1.9958824107 |
| H | 4.1188181607  | 0.0000000000 | -1.9958824107 |
| H | 0.0000000000  | 0.0000000000 | -4.8427702250 |

**Singlet *m*-benzyne RHF-CCSD(T)/cc-pVTZ**

|   |               |              |               |
|---|---------------|--------------|---------------|
| C | 0.0000000000  | 0.0000000000 | 3.0206193239  |
| C | -1.9446035084 | 0.0000000000 | 1.3066182076  |
| C | 1.9446035084  | 0.0000000000 | 1.3066182076  |
| C | -2.2211840167 | 0.0000000000 | -1.2835648143 |
| C | 2.2211840167  | 0.0000000000 | -1.2835648143 |
| C | 0.0000000000  | 0.0000000000 | -2.7315373917 |
| H | 0.0000000000  | 0.0000000000 | 5.0567659303  |
| H | -4.0817850222 | 0.0000000000 | -2.1318138780 |
| H | 4.0817850222  | 0.0000000000 | -2.1318138780 |
| H | 0.0000000000  | 0.0000000000 | -4.7841728240 |

**Triplet *m*-benzyne ROHF-CCSD(T)/cc-pVTZ**

|   |               |              |               |
|---|---------------|--------------|---------------|
| C | 0.0000000000  | 0.0000000000 | 2.7546494324  |
| C | -2.2120212435 | 0.0000000000 | 1.3495051972  |
| C | 2.2120212435  | 0.0000000000 | 1.3495051972  |
| C | -2.3174985136 | 0.0000000000 | -1.2625570232 |
| C | 2.3174985136  | 0.0000000000 | -1.2625570232 |
| C | 0.0000000000  | 0.0000000000 | -2.5608968797 |
| H | 0.0000000000  | 0.0000000000 | 4.8020415863  |
| H | -4.0876536255 | 0.0000000000 | -2.2850633597 |
| H | 4.0876536255  | 0.0000000000 | -2.2850633597 |
| H | 0.0000000000  | 0.0000000000 | -4.6094473435 |
